# Supplementary material for: Spatial Distribution of Intracranial Vessel Wall Enhancement in Hypertension and Primary Angiitis of the CNS
Source: PubMed Central journal article supplement (PMC6917817; doi:10.1038/s41598-019-55634-5), 2019-12-17
Supplement: 41598_2019_55634_MOESM1_ESM.pdf [file 41598_2019_55634_MOESM1_ESM.pdf]

**Supplemental Material for:**

**Spatial Distribution of Intracranial Vessel Wall Enhancement in Hypertension and Primary Angiitis of the CNS**

Authors: Jae W Song<sup>1</sup>, Haochang Shou<sup>2</sup>, Emmanuel C Obusez<sup>3</sup>, Scott B Raymond<sup>3†</sup>, Samuel D Rafla<sup>3</sup>, G. Abbas Kharal<sup>4††</sup>, Pamela W Schaefer<sup>3</sup>, Javier M Romero<sup>3</sup>

Affiliations:

<sup>1</sup>Department of Radiology, Division of Neuroradiology, Hospital of the University of Pennsylvania

<sup>2</sup>Department of Biostatistics, Epidemiology and Informatics, University of Pennsylvania Perelman School of Medicine

<sup>3</sup>Division of Neuroradiology, Massachusetts General Hospital, Harvard Medical School

<sup>4</sup>Department of Neurology, Massachusetts General Hospital, Harvard Medical School

Present positions:

<sup>†</sup>Department of Radiology, University of Vermont College of Medicine

<sup>††</sup> Department of Neurology, Cleveland Clinic

Supplemental Table 1: Inter-rater Agreement

| Unweighted Cohen's kappa ( $\kappa$ ) |                                      |
|---------------------------------------|--------------------------------------|
| Internal Carotid Artery Terminus      | $\kappa=0.39$ , (95% CI, 0.16-0.61)  |
| Anterior Cerebral Artery              | $\kappa=0.38$ , (95% CI, 0.23-0.52)  |
| Middle Cerebral Artery                | $\kappa=0.45$ , (95% CI, 0.34-0.55)  |
| Posterior Cerebral Artery             | $\kappa=0.18$ , (95% CI, 0.08-0.27)  |
| Vertebral Artery (V4 segment)         | $\kappa=0.48$ , (95% CI, 0.35-0.61)  |
| Basilar Artery                        | $\kappa=0.28$ , (95% CI, 0.004-0.56) |

Supplemental Table 2: Median Number of Enhancing Vessel Segments

|                         | All patients   | Primary angiitis of the CNS | Hypertension  | Primary angiitis of the CNS and Hypertension |
|-------------------------|----------------|-----------------------------|---------------|----------------------------------------------|
| All vessel segments     | 4.0 [1.0, 9.0] | 11.0 [3.0, 17.0]            | 6.0 [3.0, 11] | 15 [6.75, 18.25]                             |
| Primary <sup>#</sup>    | 2.0 [0, 6.0]   | 6 [0.5, 9.75]               | 5 [0.5, 7.0]  | 8.00 [3.75, 10.25]                           |
| Secondary <sup>**</sup> | 0 [0, 2.0]     | 2.5 [0.25, 4.75]            | 1.0 [0, 3.0]  | 4.00 [0.75, 5.00]                            |
| Tertiary <sup>††</sup>  | 0 [0, 1.0]     | 3.00 [1.25, 3.75]           | 0 [0, 1.5]    | 3.00 [0.75, 4.50]                            |

\*Presented as median and interquartile ranges [IQR]

# Basilar artery and bilateral A1, M1, P1, V4, ICA terminus (11 segments)

\*\*Bilateral A2, M2, P2 (6 segments)

†† Bilateral A3, M3, P3 (6 segments)
